# Supplementary material for: A Dual-Functional Flexible Oxided Carbon Cloth (OCC)/MoS₂ Substrate for In-Situ SERS Detection and On-Site Photocatalytic Degradation of Organic Contaminants in Aquatic Ecosystems
Source: Research Square preprint supplement (doi:10.21203/rs.3.rs-8233925/v1), 2025-12-05
Supplement: Supplementary file 1 [file 9388f2b13ab7b777662b87a7.docx]

**Supplementary Information**

**A Dual-Functional Flexible Oxided Carbon Cloth (OCC)/MoS₂ Substrate for In-Situ SERS Detection and On-Site Photocatalytic Degradation of Organic Contaminants in Aquatic Ecosystems**

Xinyue Songa,1, Baoqin Haoa,1, Yongzheng Zhanga, Xiaohui Renc, Xuelin Zhang d, Jianfeng Wu b,*, Jianwei Xie b,* , Xin Lia,*

*a State Key Laboratory of Space Power-Sources, MOE Engineering Research Center for Electrochemical Energy Storage and Carbon Neutrality in Cold Regions, School of Chemistry and Chemical Engineering, Harbin Institute of Technology, Harbin 150001, China*

*b State Key Laboratory of Toxicology and Medical Countermeasures and Laboratory of Toxicant Analysis, Institute of Pharmacology and Toxicology, Academy of Military Medical Sciences, Beijing 100850, China.*

*c College of Textile and Clothing, Yancheng Institute of Technology, Yancheng 224051, China*

*d School of Astronautics, Harbin Institute of Technology, Harbin 150001, China*

* Corresponding authors.

E-mail addresses: lixin@hit.edu.cn (X. Li).

**Supporting Experimental Section**

**Reagents and materials.** Sulfur sublimed were bought from Tianjin Guangfu Science and Technology Development Co., Ltd (Tianjin, China). Molybdenum trioxide (MoO3) was purchased from Damas-beta (Shanghai, China). Potassium permanganate (KMnO4) was purchased from Aladdin (Shanghai, China). Sulfuric acid (H2SO4) and phosphoric acid (H3PO4) were obtained from Sinopharm Chemical Reagent Co., Ltd (Beijing, China). Rhodamine 6G (R6G) were purchased from Macklin Biochemical Co., Ltd (Shanghai, China). All chemicals used in this work were of analytic purity and used without further purification.

**Characterization.** Scanning electron microscopy was used to analyze the morphology of the samples (SEM, Hitachi S-8010, Kyoto, Japan). Transmission electron microscopy (TEM) was performed using a JEOL JEM-2100. A Renishaw inVia micro-Raman spectroscopy was applied to obtain the SERS spectra (Renishaw, Britain). A contact angle measuring instrument (JC2000D1) was applied to obtain the water contact angle (CA). UV-visible (UV-vis) absorption spectroscopy surveys were performed on the TU1901 spectrometer (Beijing Purkinje General Instrument Co., Ltd). The crystal phase was analyzed by X-ray diffractometer (XRD, Bruker D8 Advance), and the surface chemical valence was characterized by X-ray photoelectron spectroscopy (XPS, Escalab 250Xi spectrometer).

**Theoretical simulation.** The VASP package was utilized to conduct DFT calculations. The Perdew-Burke-Ernzerhof (PBE) generalized gradient approximation (GGA) was employed for all calculations. The convergence criteria for each atomic force and the total energy optimization were set at 0.02 eV Å-1 and 10-5 eV, respectively. The charge density were optimized to a convergence criterion of 10-6 eV.

b)

a)

**Figure S1.** (a) Thickness distribution analysis of MoS2 nanosheets. (b) Width distribution analysis of MoS2 nanosheets.


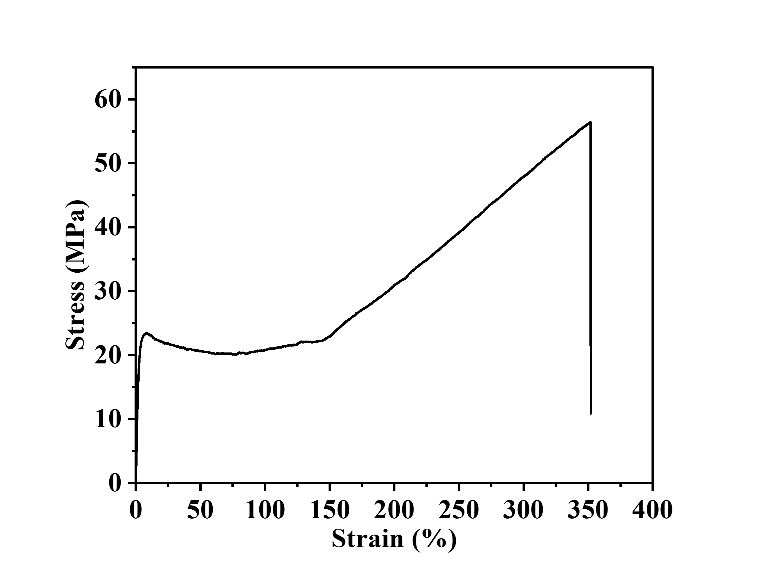


Figure S2. Stress-strain curves of OCC/MoS2 substrate.


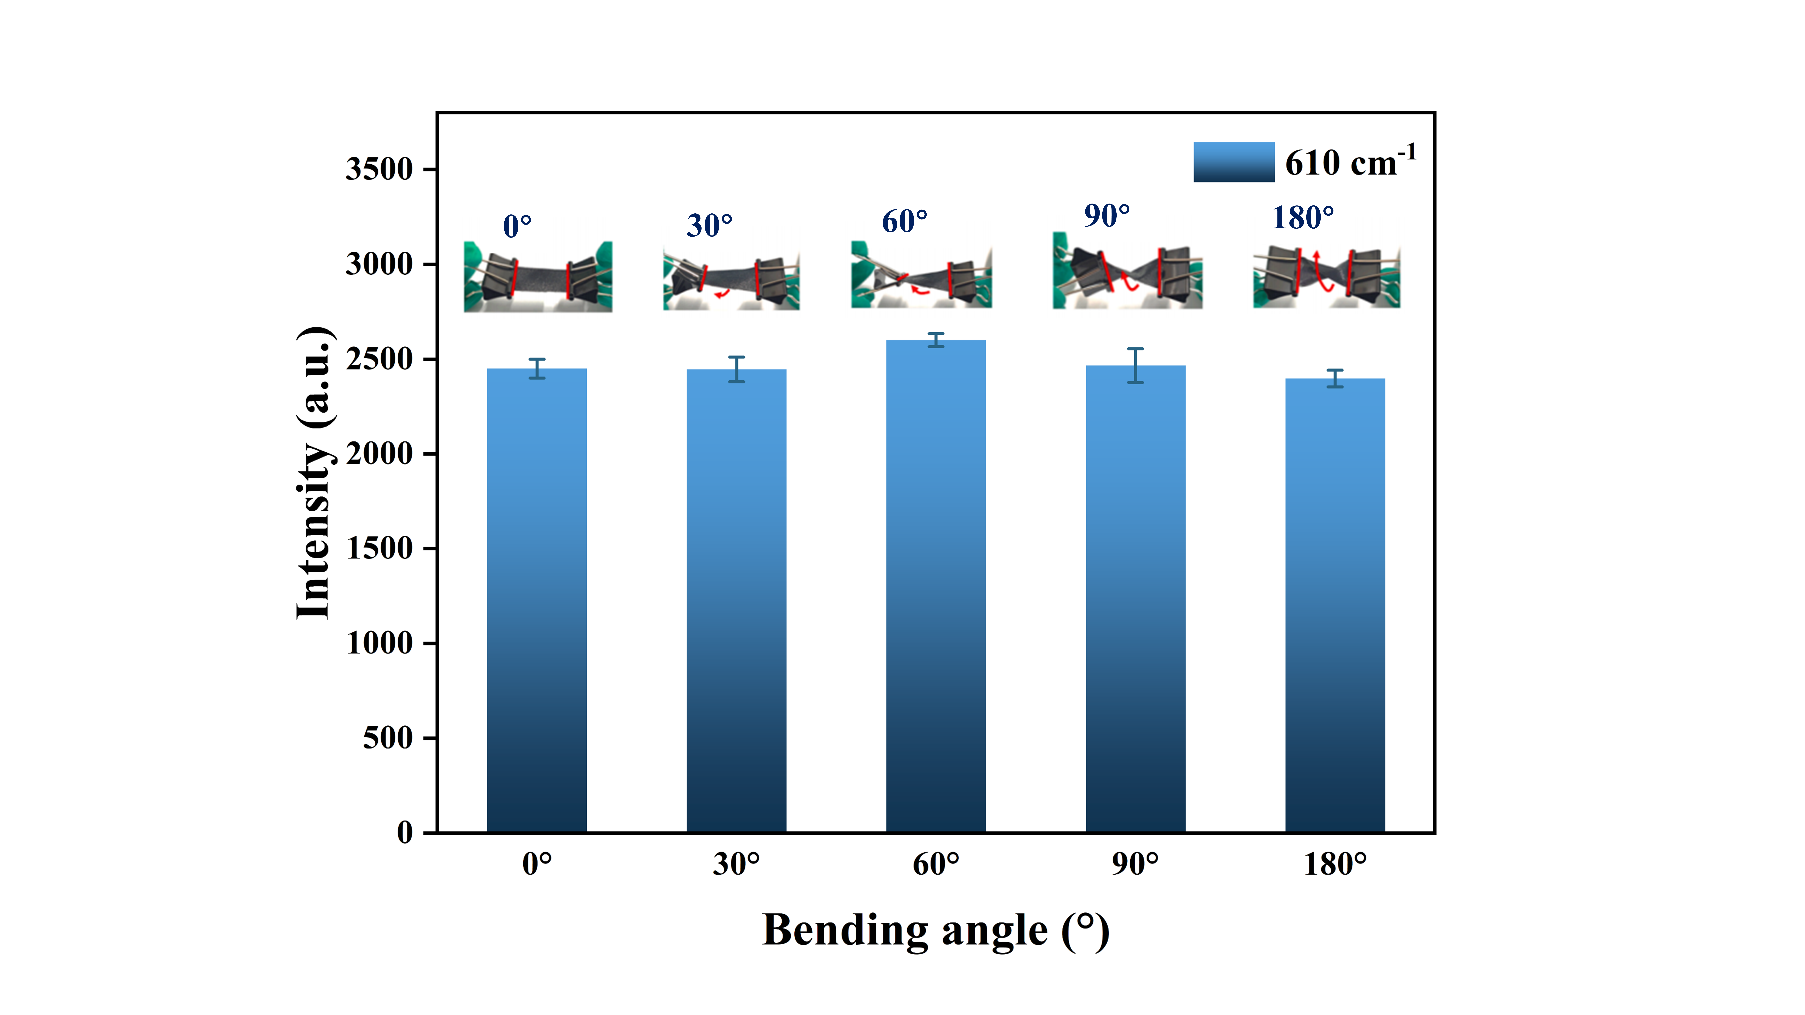


**Figure S3.** Changes in the intensity of the characteristic peak of 10−5 M R6G SERS detection after twisting OCC/MoS2 substrate at different angles

**Table S1** Assignments and Raman Shift (cm−1) for SERS Spectra of R6G

| **Vibrational description** | **observed** | **reported1** |
| --- | --- | --- |
| C–C ring in-plane bending in xanthene/phenyl rings | 610 | 612 |
| C–H out-of-plane bending | 773 | 774 |
| C–H plane bending in xanthene ring | 1176 | 1184 |
| hybrid mode (xanthene/phenyl rings and NHC2H5 group) | 1306 | 1314 |
| C–C stretching in xanthene ring | 1505 | 1509 |
| C–C stretching in phenyl ring | 1572 | 1575 |
| C–C stretching in xanthene ring | 1648 | 1650 |

**Reference**

(1) Li, L.; Zhang, L.; Gou, L.; Wei, S.; Hou, X.; Wu, L. Au Nanoparticles Decorated CoP Nanowire Array: A Highly Sensitive, Anticorrosive, and Recyclable Surface-Enhanced Raman Scattering Substrate. *Analytical Chemistry* **2023**, *95* (29), 11037-11046. DOI: 10.1021/acs.analchem.3c01282.
